# Supplementary material for: Uncertainty, Anxiety and Isolation: Experiencing the COVID-19 Pandemic and Lockdown as a Woman with Polycystic Ovary Syndrome (PCOS)
Source: J Pers Med. 2021 Sep 25;11(10):952. doi: 10.3390/jpm11100952 (PMC8539750; doi:10.3390/jpm11100952)
Supplement: Supplementary file 1 [file jpm-11-00952-s001.zip › jpm-1385457-supplementary.pdf]

Table S1 – Participant characteristics collected via online survey

| Variable                                    | Mean $\pm$ SD or <i>N</i> (%) |
|---------------------------------------------|-------------------------------|
| <b>Age</b> (years)                          | 31.08 $\pm$ 5.62              |
| <b>Time since diagnosis</b> (years)         | 8.69 $\pm$ 5.32               |
| <b>Weight</b> (kg)                          | 107.38 $\pm$ 27.03            |
| <b>Body mass index</b> (kg/m <sup>2</sup> ) | 38.90 $\pm$ 9.66              |
| <b>Ethnicity</b>                            |                               |
| White                                       | 10 (83)                       |
| Asian or Asian British                      | 2 (17)                        |
| <b>Marital Status</b>                       |                               |
| Married                                     | 6 (50)                        |
| Single                                      | 2 (17)                        |
| Co-habiting                                 | 2 (17)                        |
| Long-term relationship                      | 1 (8)                         |
| Civil partnership                           | 1 (8)                         |
| <b>Employment status</b>                    |                               |
| Full-time employed                          | 4 (33)                        |
| Part-time employed                          | 2 (17)                        |
| House person                                | 2 (17)                        |
| Student                                     | 2 (17)                        |
| Self-employed                               | 1 (8)                         |
| Unemployed                                  | 1 (8)                         |
| <b>Education level</b>                      |                               |
| Undergraduate                               | 4 (33)                        |
| Postgraduate                                | 3 (25)                        |
| College                                     | 3 (25)                        |
| Secondary                                   | 2 (17)                        |
| <b>Children</b>                             |                               |
| No                                          | 7 (58)                        |
| Yes                                         | 5 (42)                        |
| <b>Household income</b>                     |                               |
| $\leq$ £39,999                              | 6 (50)                        |
| £40,000-£79,999                             | 4 (33)                        |
| $\geq$ £80,000                              | 2 (17)                        |

| <b>COVID-19 Lockdown question</b>                     | <b><i>N (%)</i></b> |
|-------------------------------------------------------|---------------------|
| <b>Self-isolating due to COVID-19</b>                 |                     |
| No                                                    | 9 (75)              |
| Yes                                                   | 3 (25)              |
| <b>Difficulty following restrictions</b>              |                     |
| No difficulty                                         | 3 (25)              |
| Somewhat difficult                                    | 8 (67)              |
| Very difficult                                        | 1 (8)               |
| <b>Effect of lockdown on health</b>                   |                     |
| A significant negative effect                         | 4 (33)              |
| A small negative effect                               | 6 (50)              |
| No effect                                             | -                   |
| A small positive effect                               | 2 (17)              |
| A significant positive effect                         | -                   |
| <b>Effect of lockdown on physical activity levels</b> |                     |
| A significant reduction                               | 6 (50)              |
| A small reduction                                     | 2 (17)              |
| No change                                             | -                   |
| A small increase                                      | 3 (25)              |
| A significant increase                                | 1 (8)               |
| <b>Effect of lockdown on social interactions</b>      |                     |
| A significant reduction                               | 11 (92)             |
| A small reduction                                     | 1 (8)               |
| No change                                             | -                   |
| A small increase                                      | -                   |
| A significant increase                                | -                   |
| <b>Effect of lockdown on sleep</b>                    |                     |
| A significant negative effect                         | 3 (25)              |
| A small negative effect                               | 7 (58)              |
| No effect                                             | 1 (8)               |
| A small positive effect                               | 1 (8)               |
| A significant positive effect                         | -                   |
| <b>Effect of lockdown on finances</b>                 |                     |
| A significant negative effect                         | 3 (25)              |
| A small negative effect                               | 2 (17)              |
| No effect                                             | 5 (42)              |
| A small positive effect                               | 2 (17)              |
| A significant positive effect                         | -                   |
